# Supplementary material for: Per- and Polyfluoroalkyl Substance Exposure Combined with High-Fat Diet Supports Prostate Cancer Progression
Source: MDPI journal article supplement (doi:10.3390/nu13113902), 2021-10-30
Supplement: s1 [file s1]

**A**

| Metabolism                             | P Value   | Enrichment Ratio |
|----------------------------------------|-----------|------------------|
| Threonine & 2-Oxobutanoate Degradation | 9.0355E-4 | 4.757            |
| Phosphatidylethanolamine Biosynthesis  | 0.014279  | 4.057            |
| Homocysteine Degradation               | 0.014407  | 4.036            |
| Selenoamino Acid Metabolism            | 0.014687  | 3.620            |
| Biotin Metabolism                      | 0.014849  | 4.039            |
| Lysine Degradation                     | 0.016517  | 3.403            |
| Methionine Metabolism                  | 0.016937  | 3.106            |
| Glycine & Serine Metabolism            | 0.023257  | 2.599            |
| Catecholamine Biosynthesis             | 0.038154  | 3.494            |
| Thyroid Hormone Synthesis              | 0.038154  | 3.494            |
| Carnitine Synthesis                    | 0.24275   | 1.494            |
| Ammonia Recycling                      | 0.25056   | 1.533            |

**B**

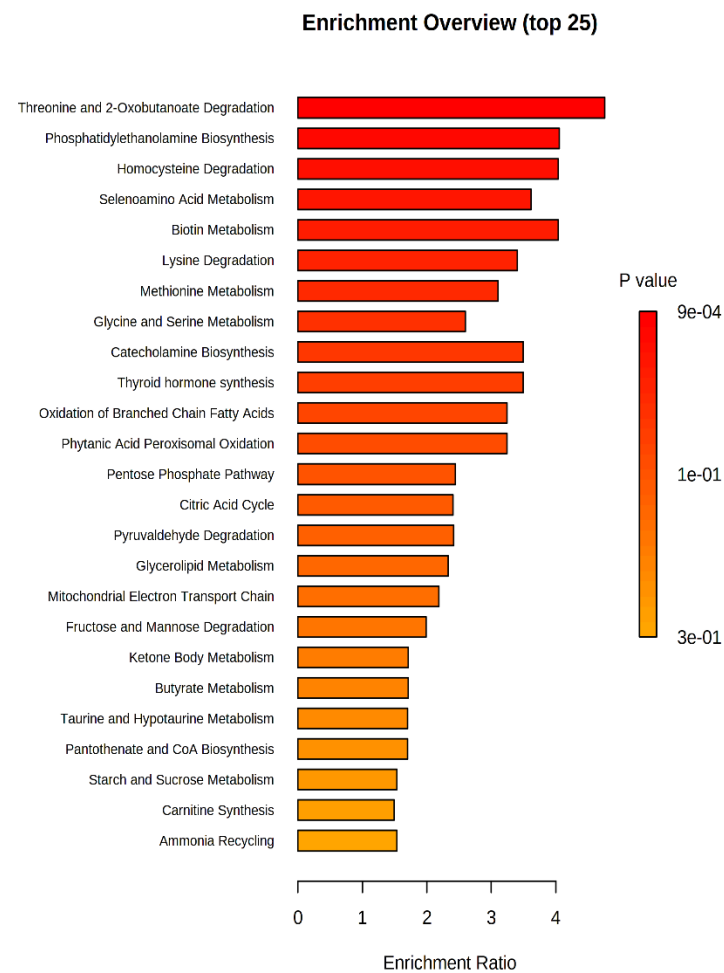

**Figure S1.** PFAS exposure upregulates mitochondrial dependence (citric acid cycle, PPP), and altered amino acid metabolism (serine & lysine) . Metabolic pathways that were upregulated in the PFAS-treated group compared to a non-treated control group were cross referenced and pathways that were upregulated in the PFAS group were listed based on enrichment ratio.

# Veh vs. PFOS

## Enrichment Overview (top 25)

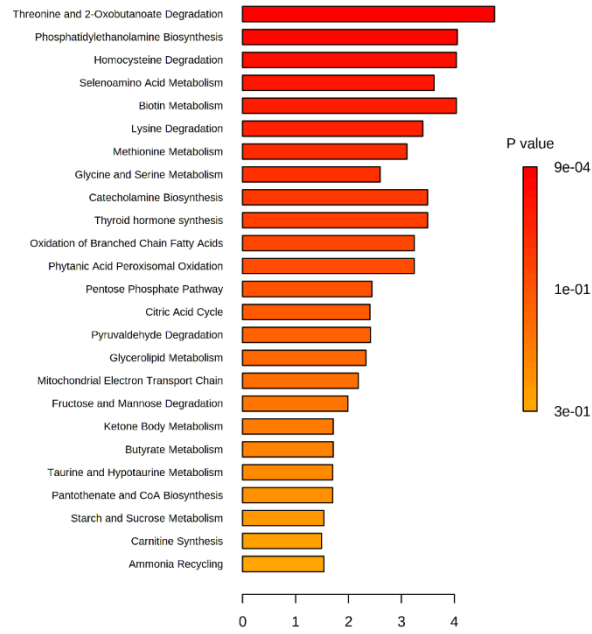

# Veh vs. DHT

## Enrichment Overview (top 25)

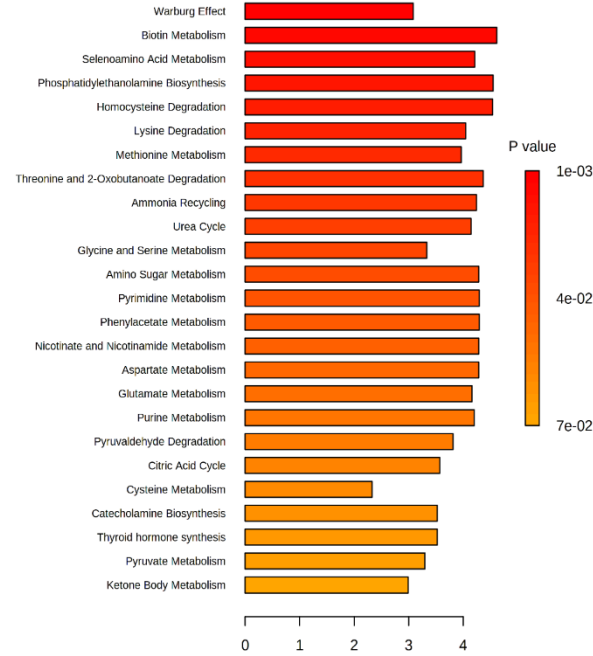

# DHT vs. DHT/PFOS

## Enrichment Overview (top 25)

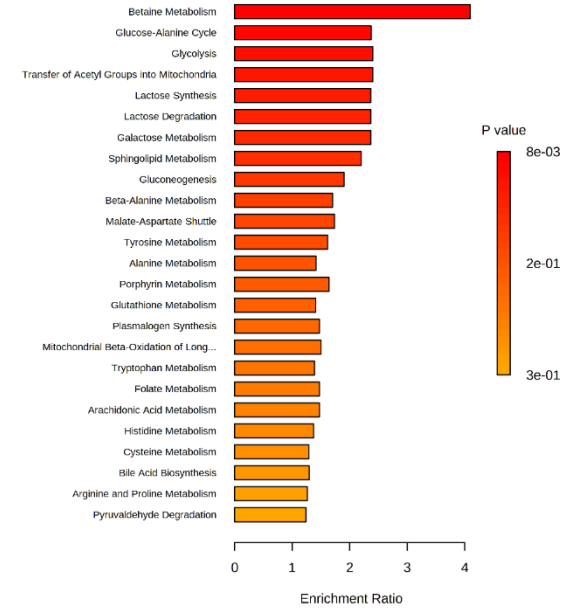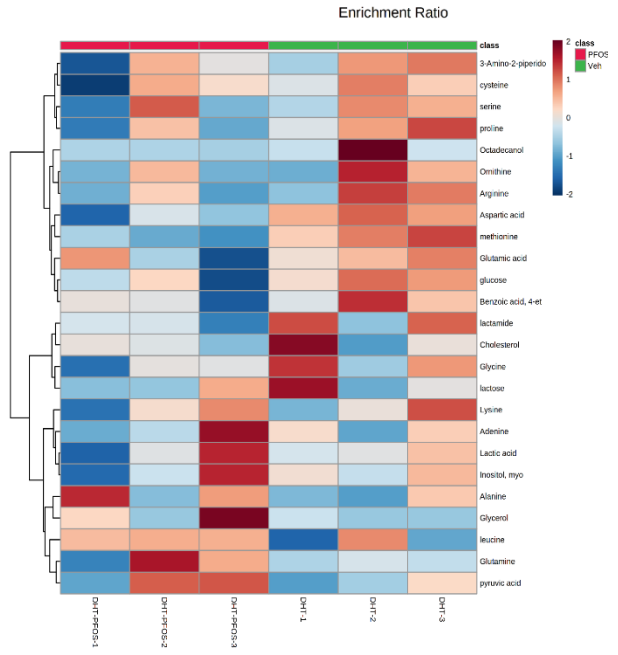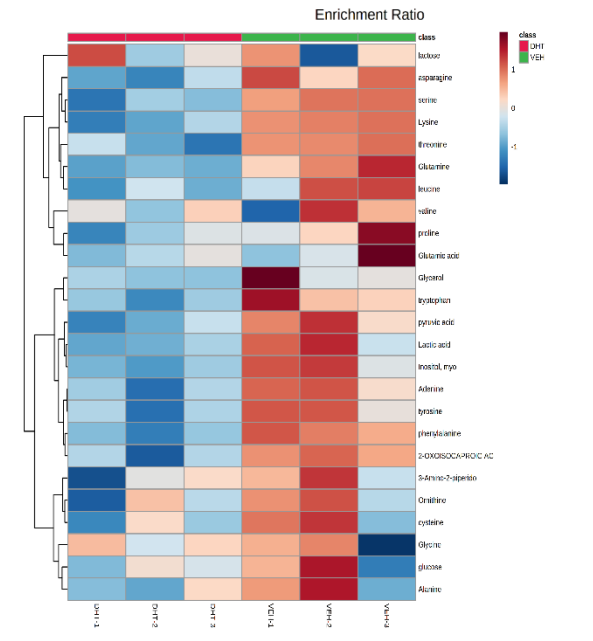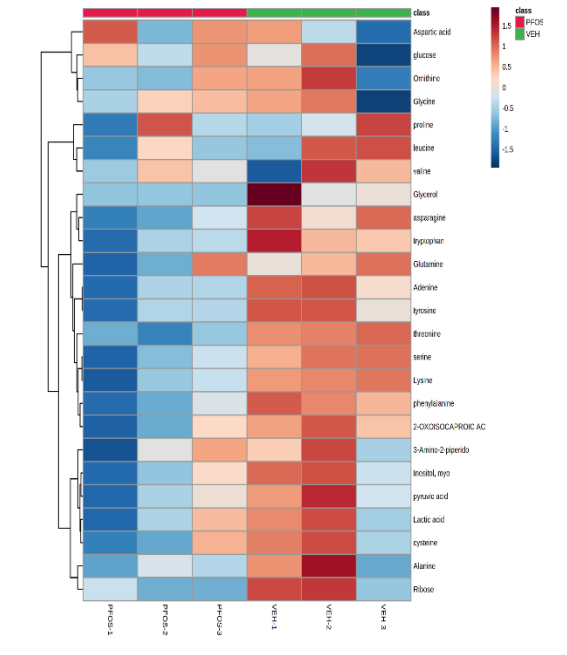

Figure S2

GSEA Dotplot for Prostate – HF against HF+PFOS, Prostate

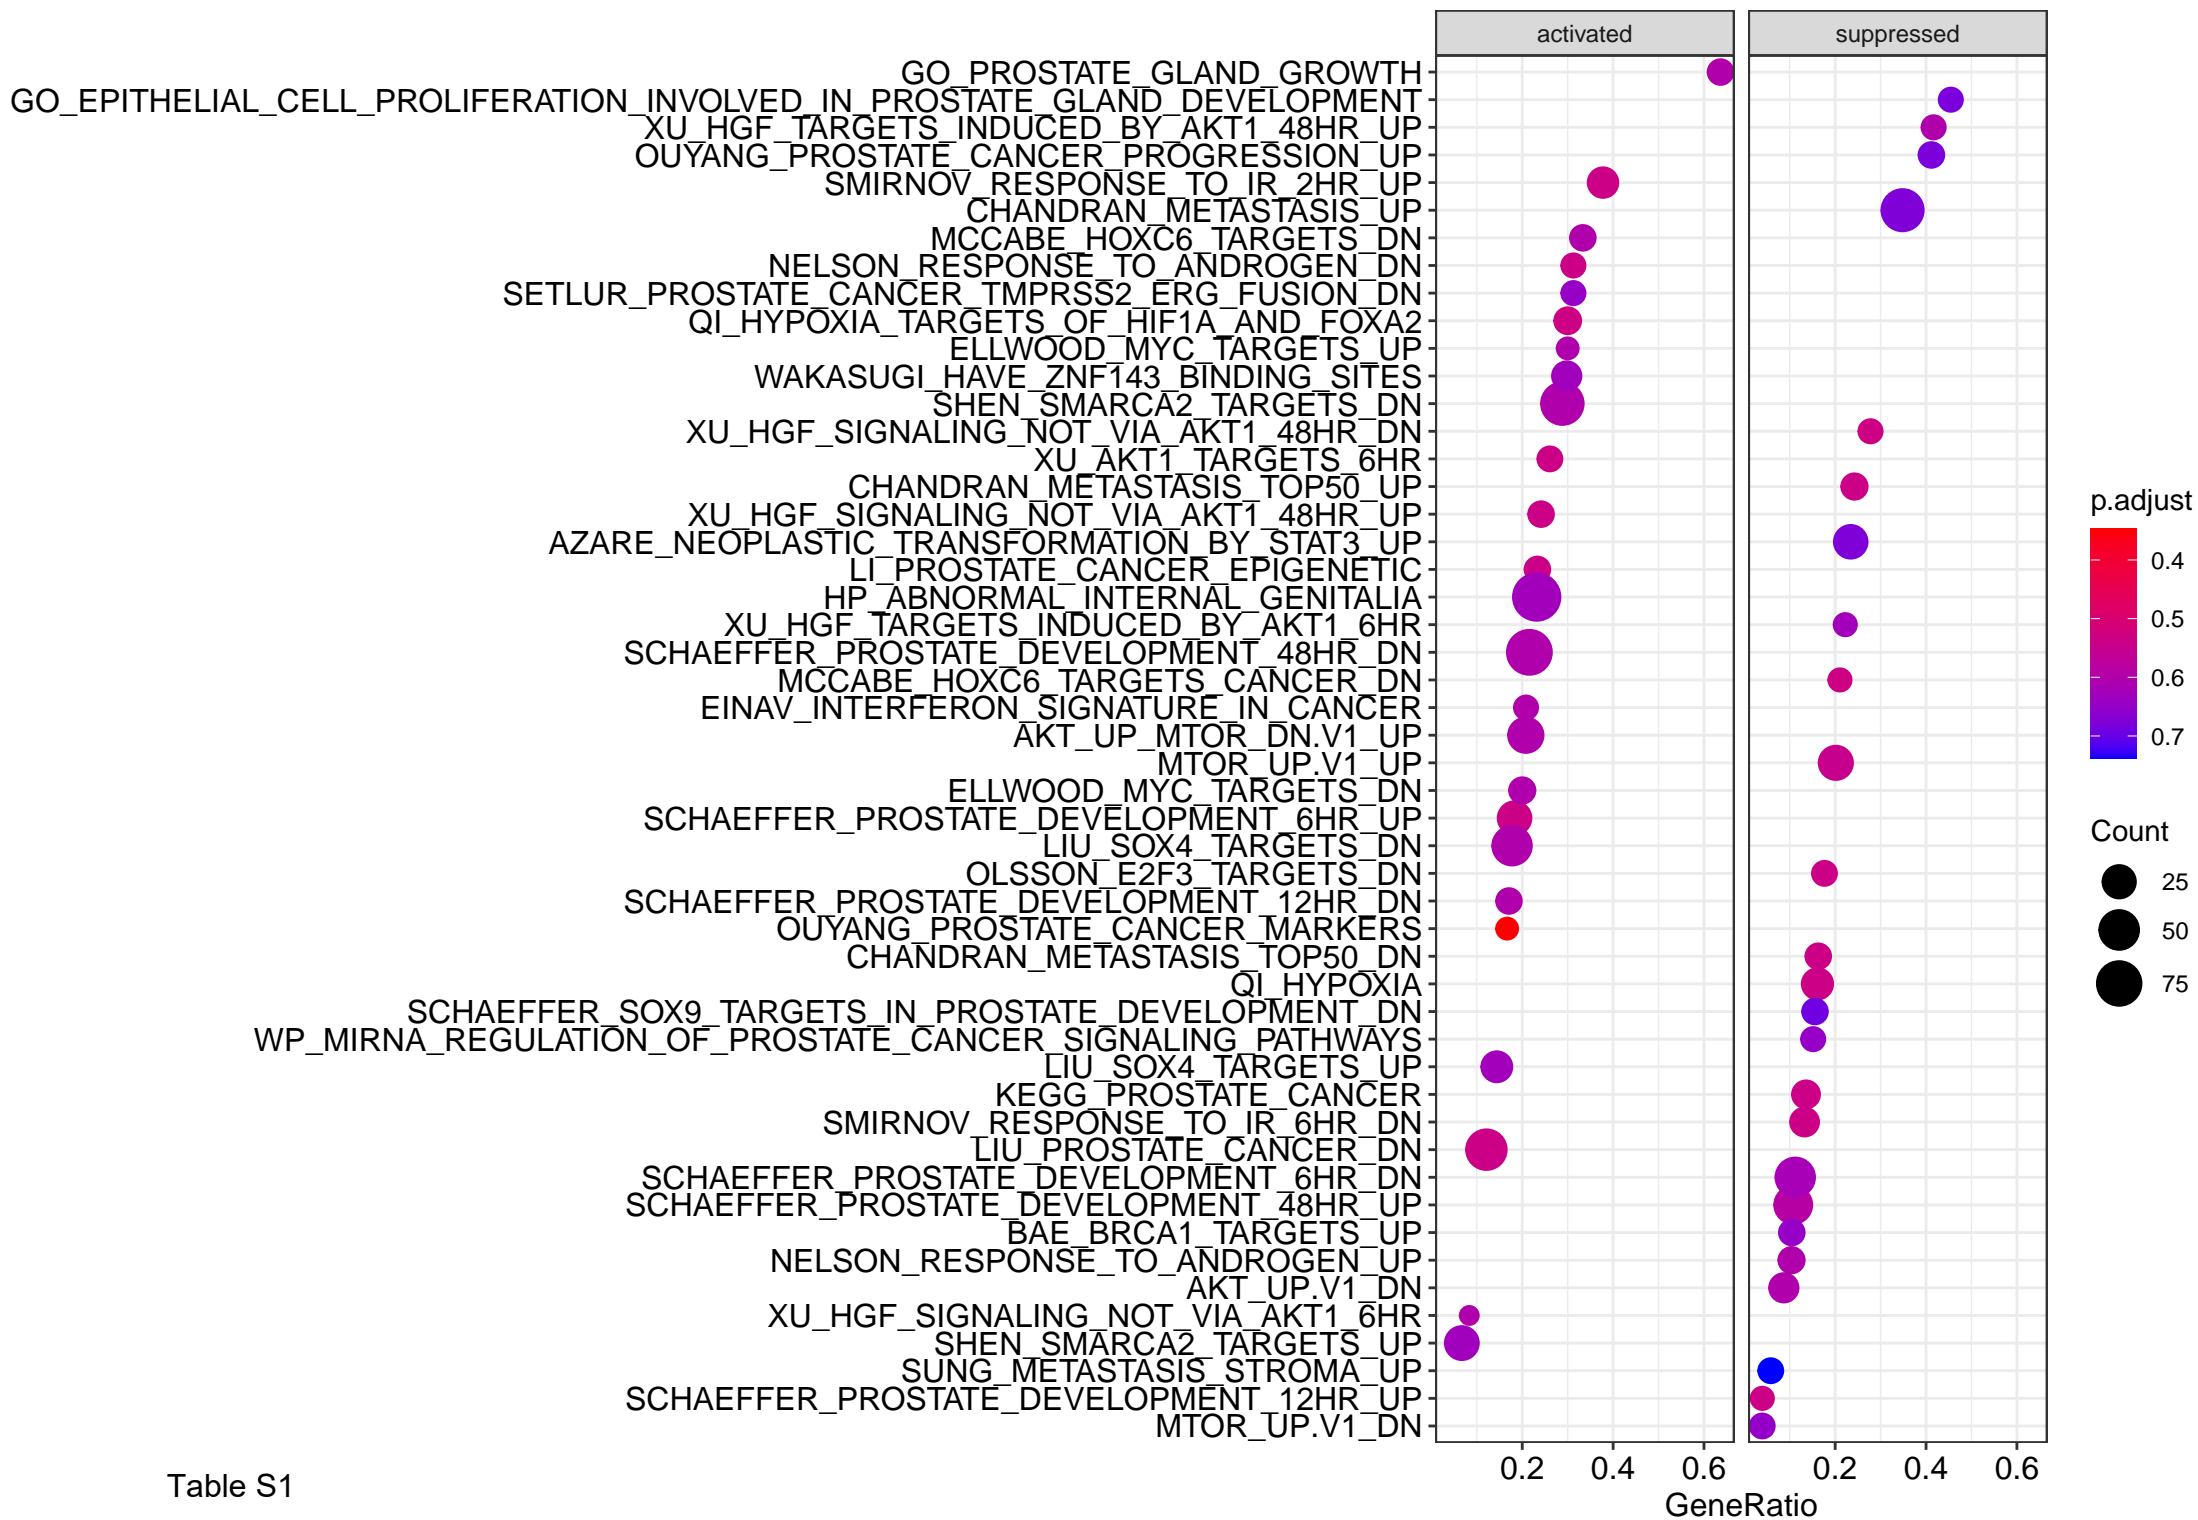

Table S1

GSEA Dotplot for Prostate – HF against HF+PFOS, Metabolism

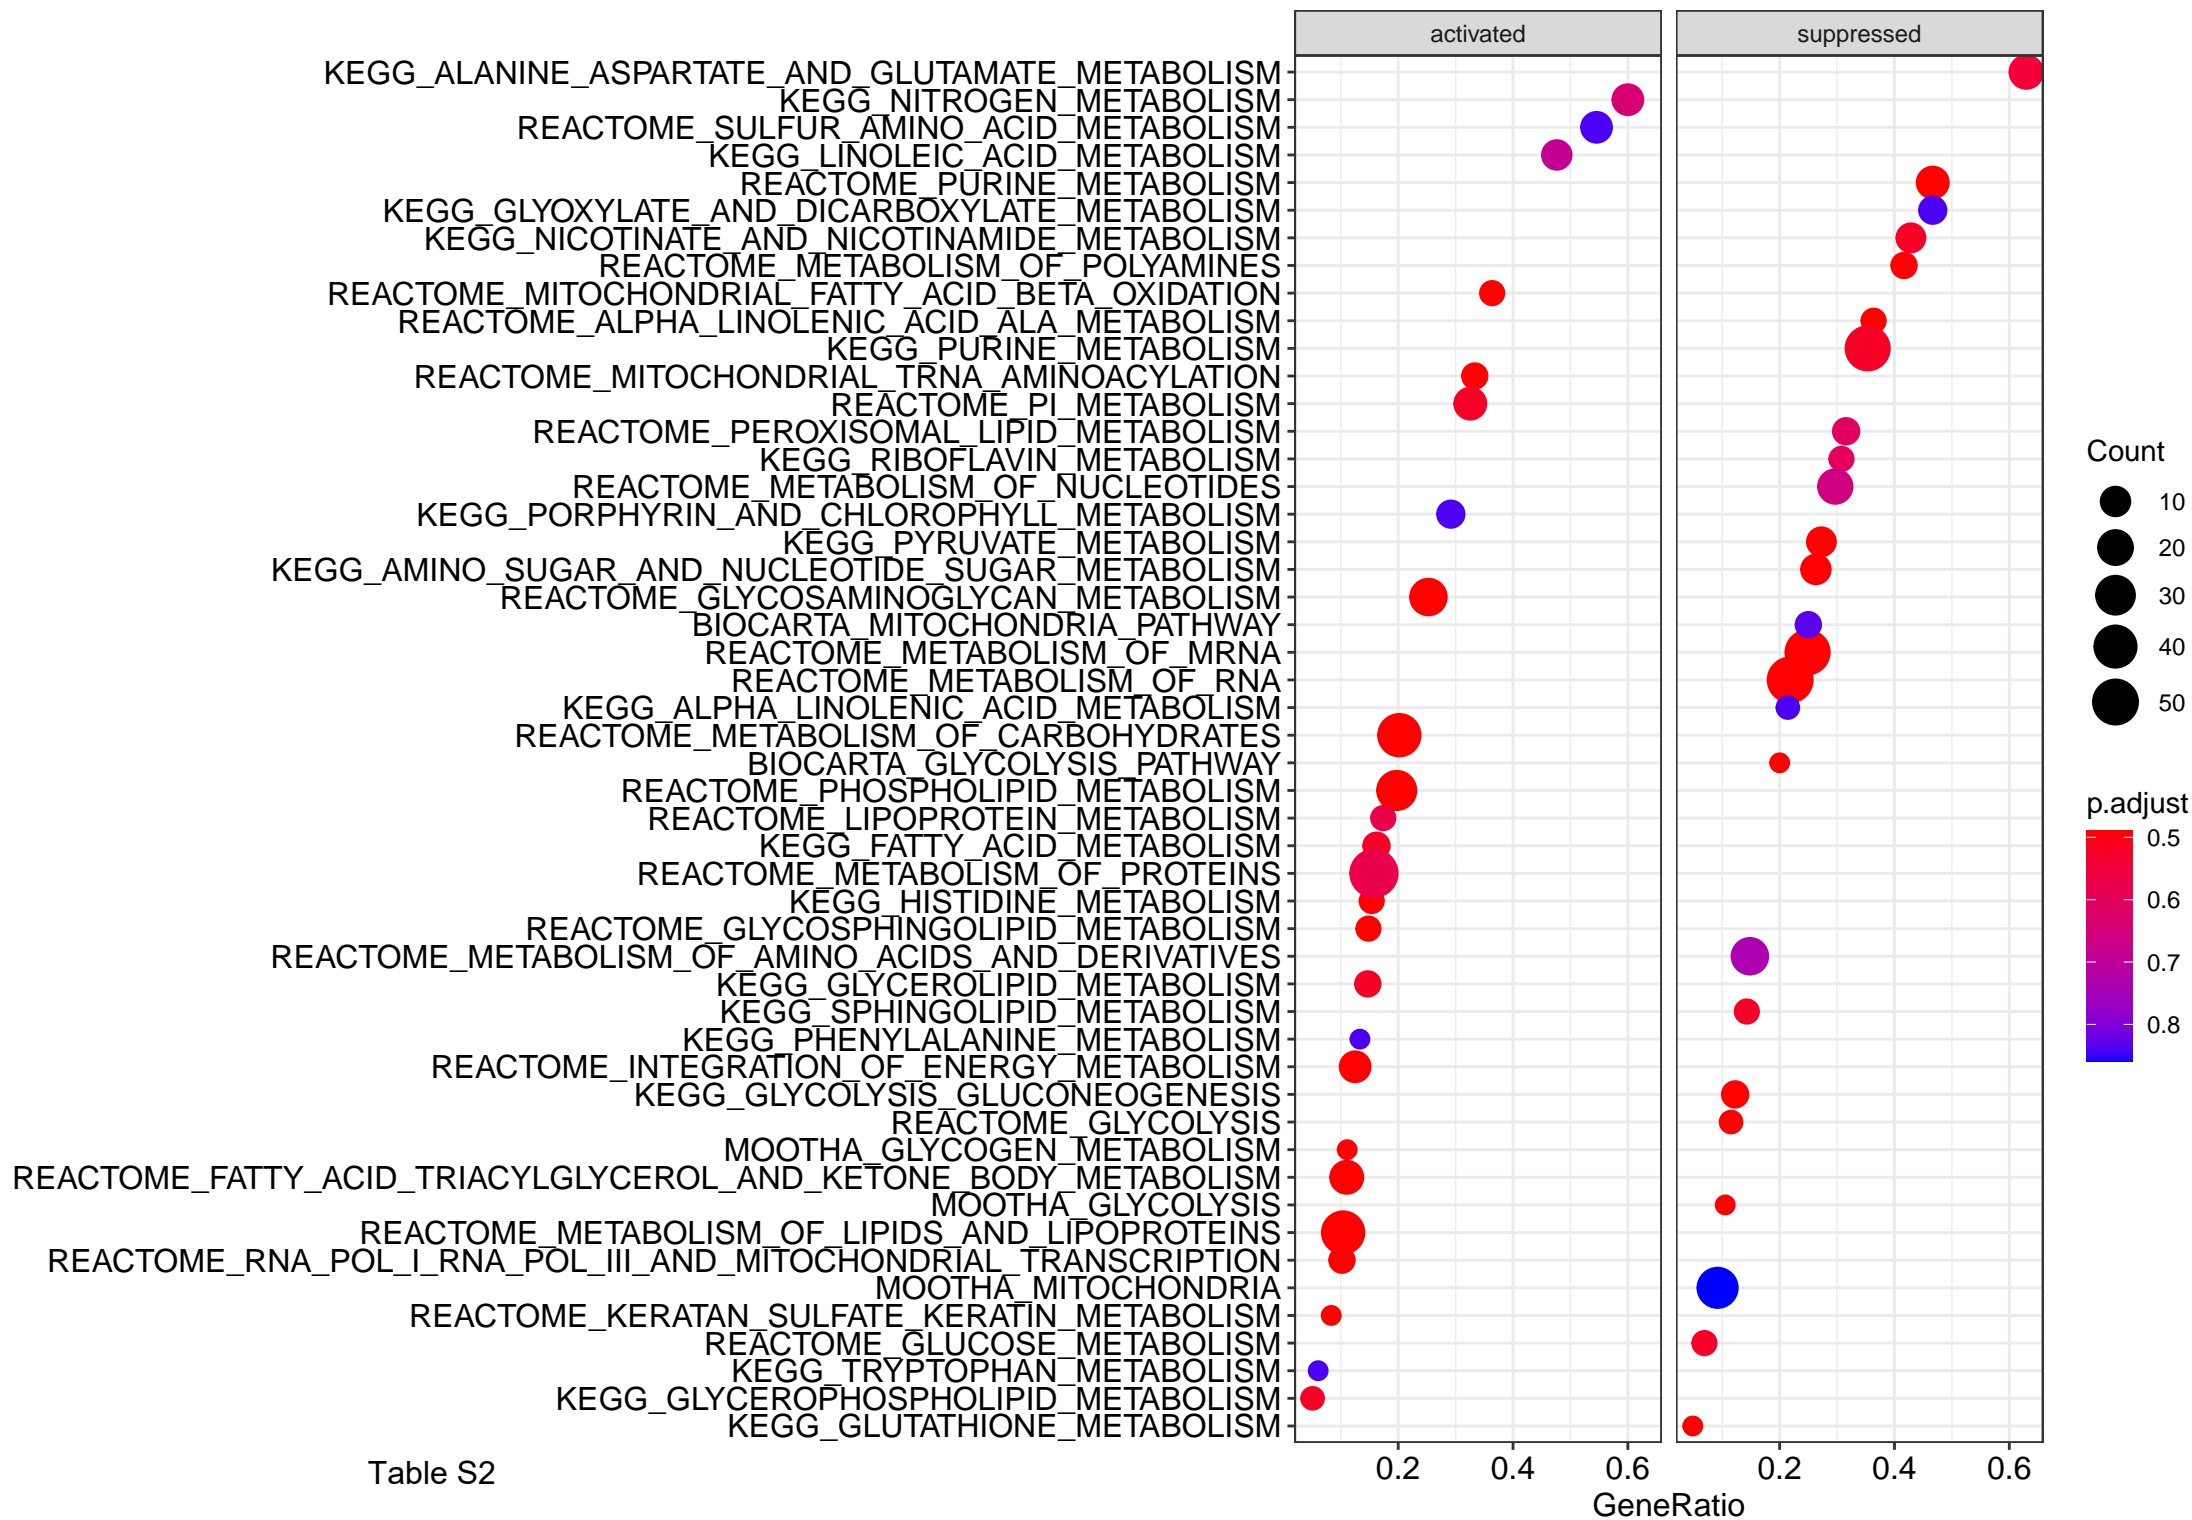

GSEA Dotplot for Prostate – HF against HF+PFOS, PPAR targets

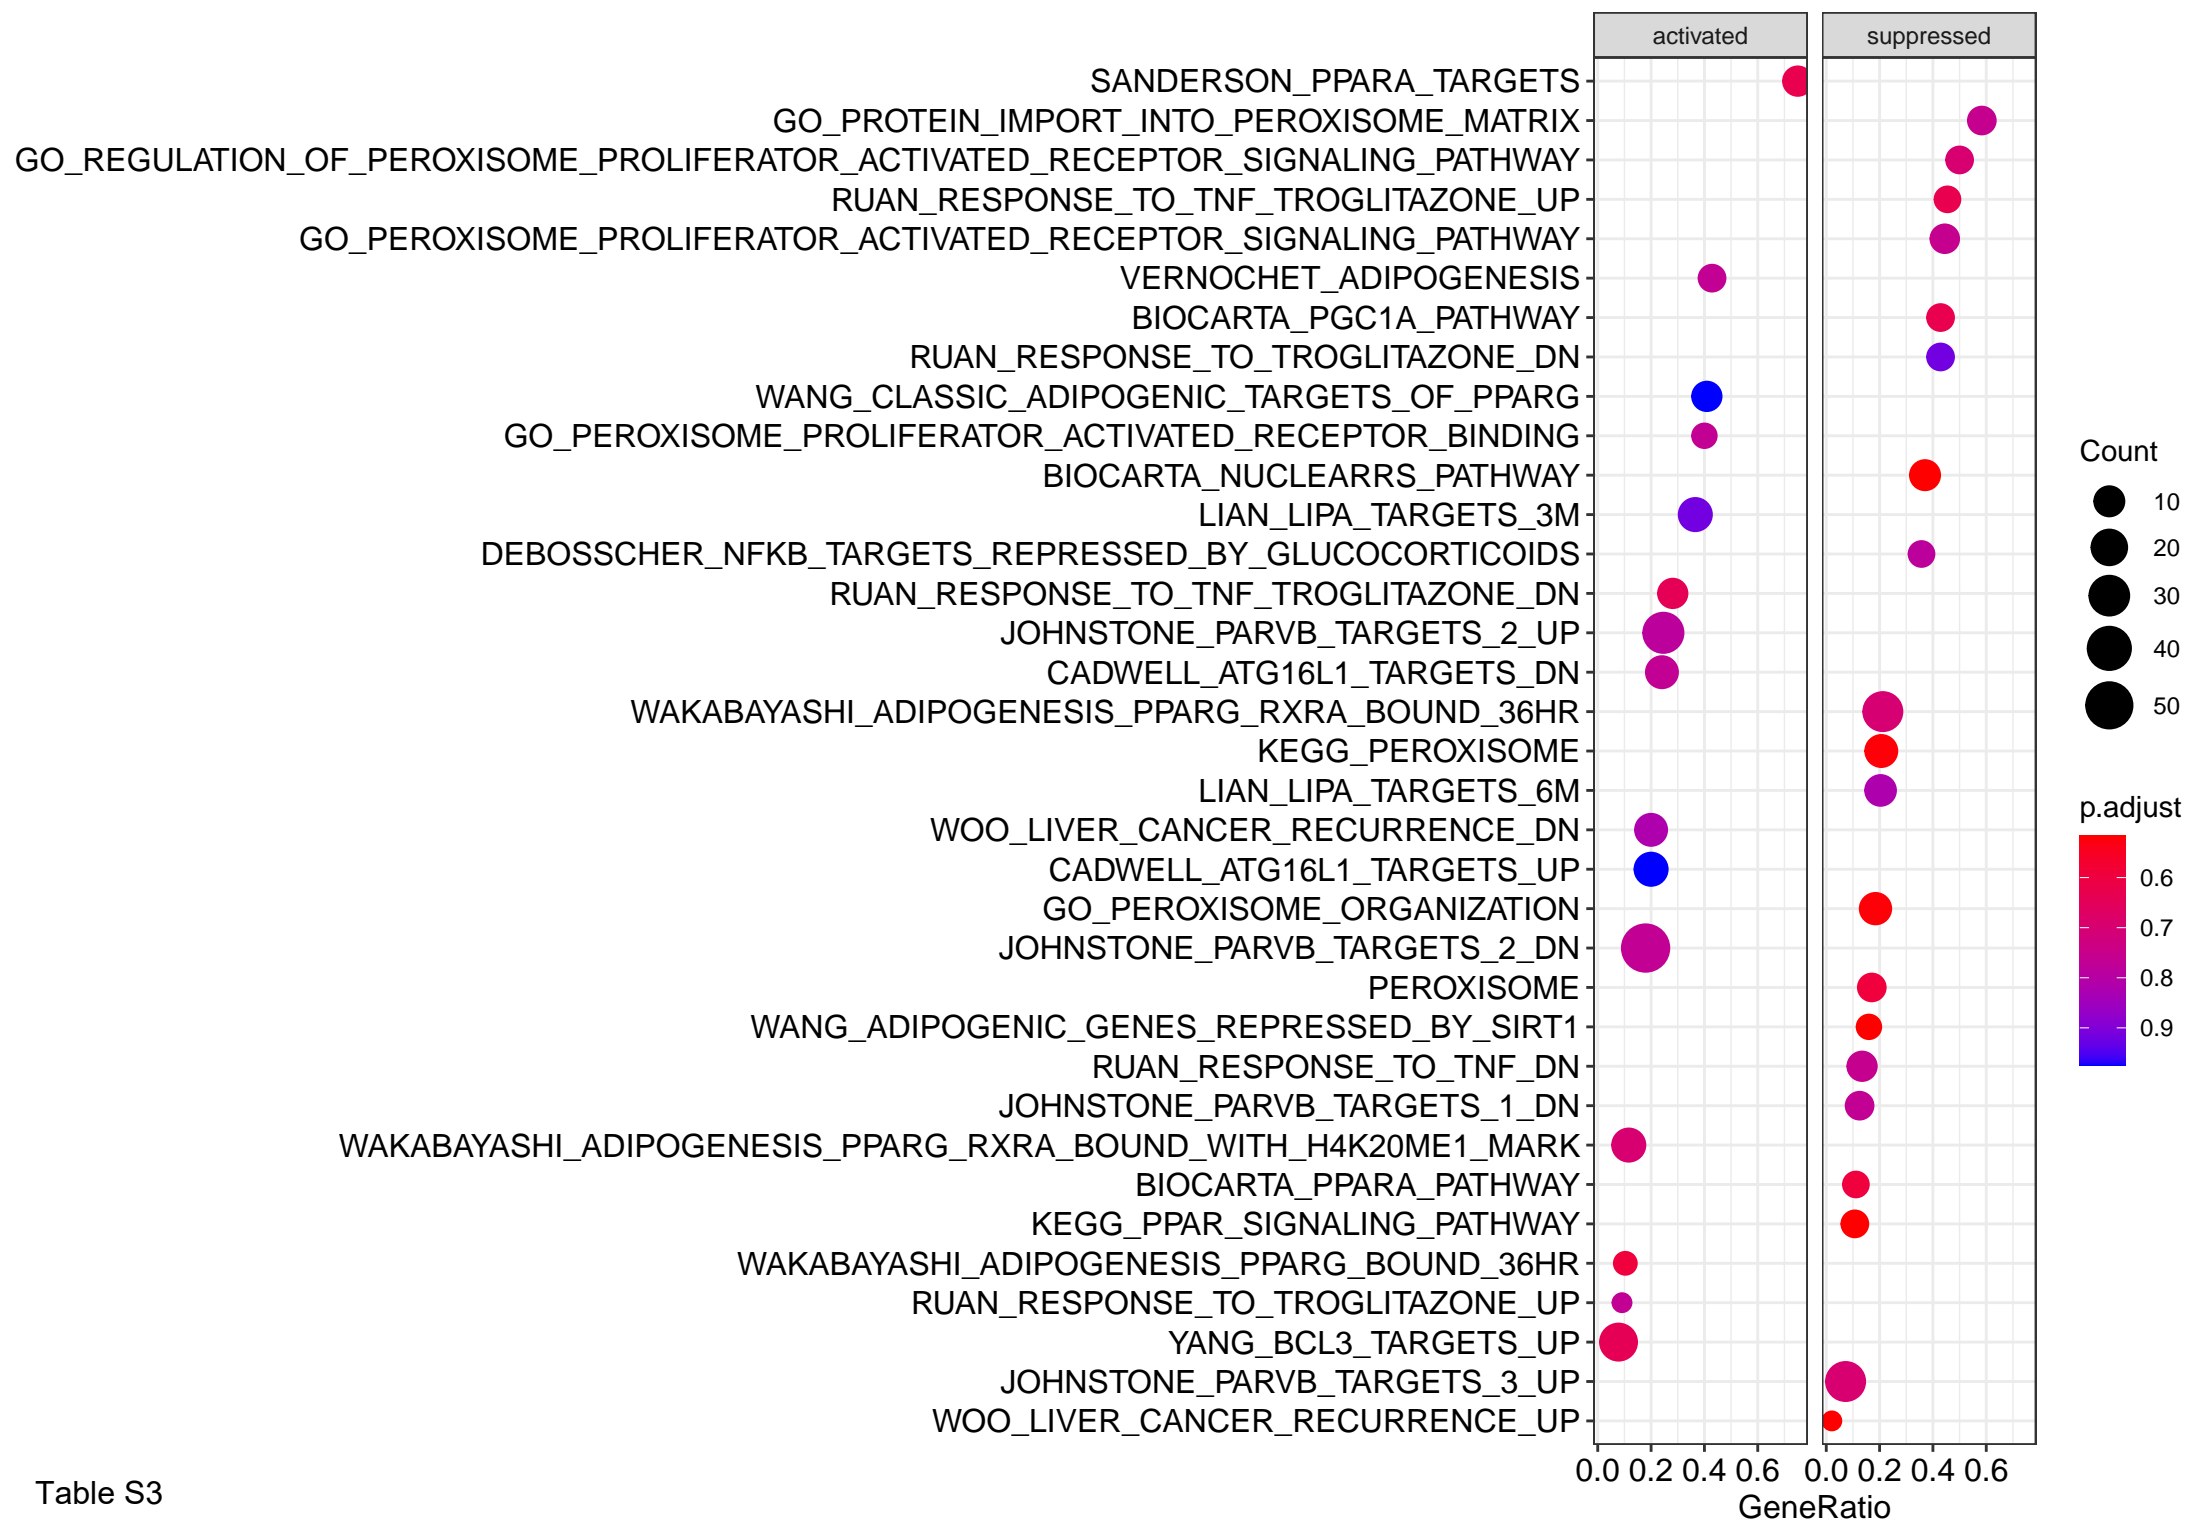

GSEA Dotplot for Prostate – HF, Metabolism

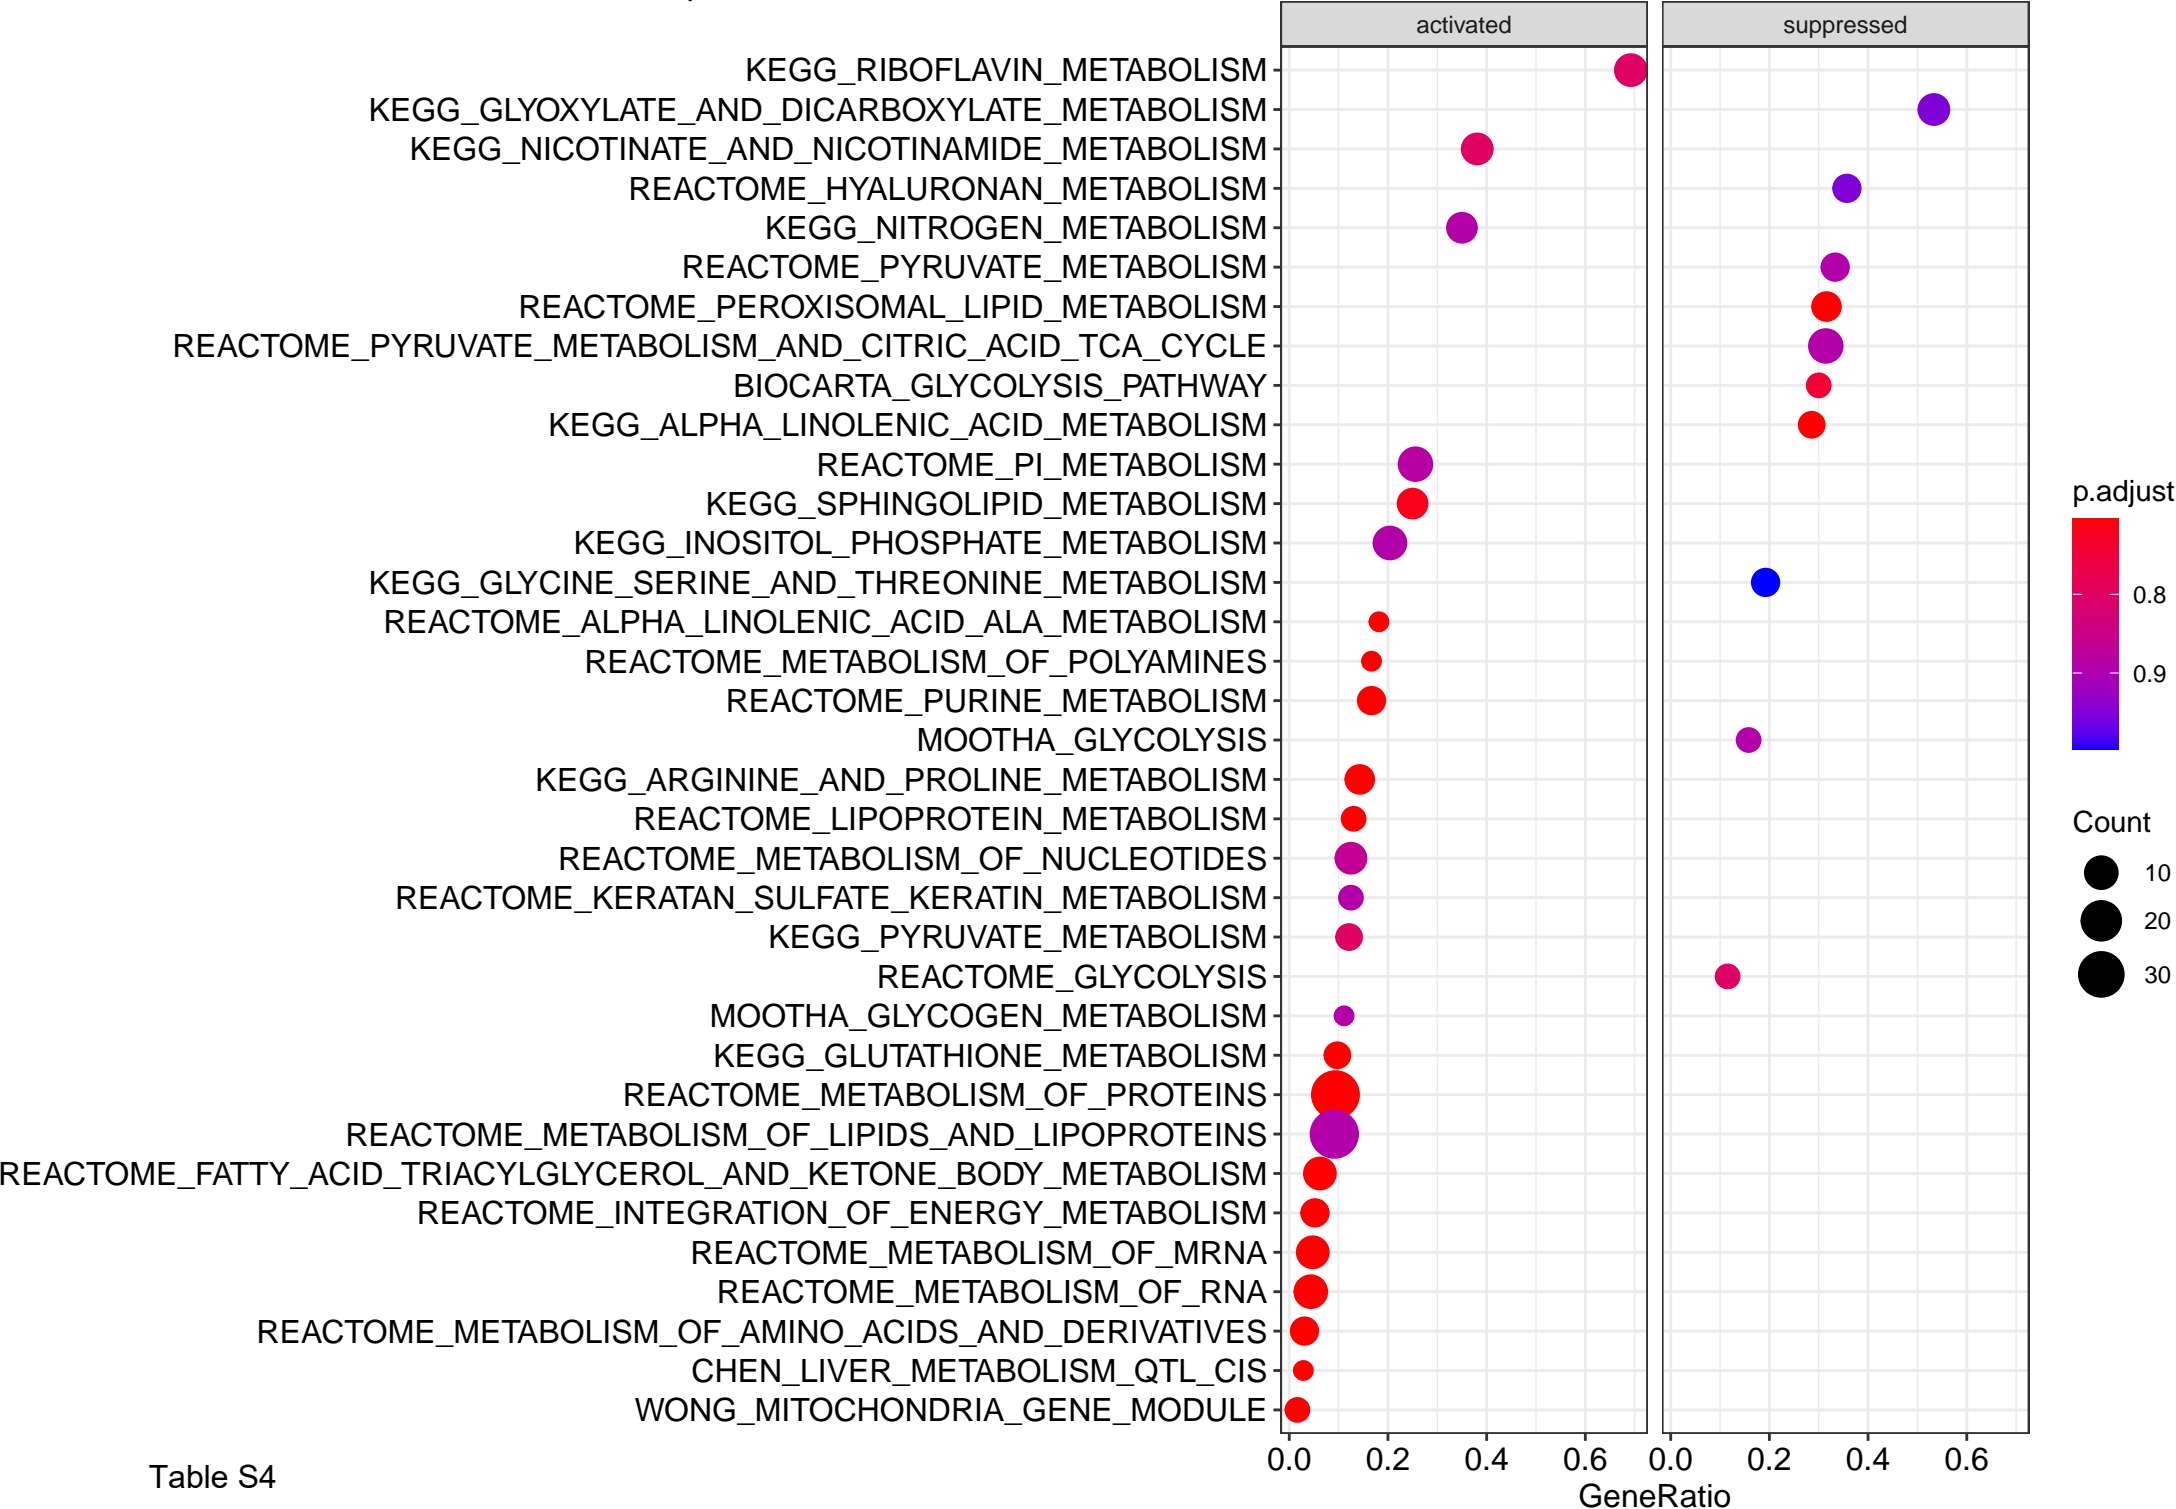

Table S4

GSEA Dotplot for Prostate – HF, PPAR

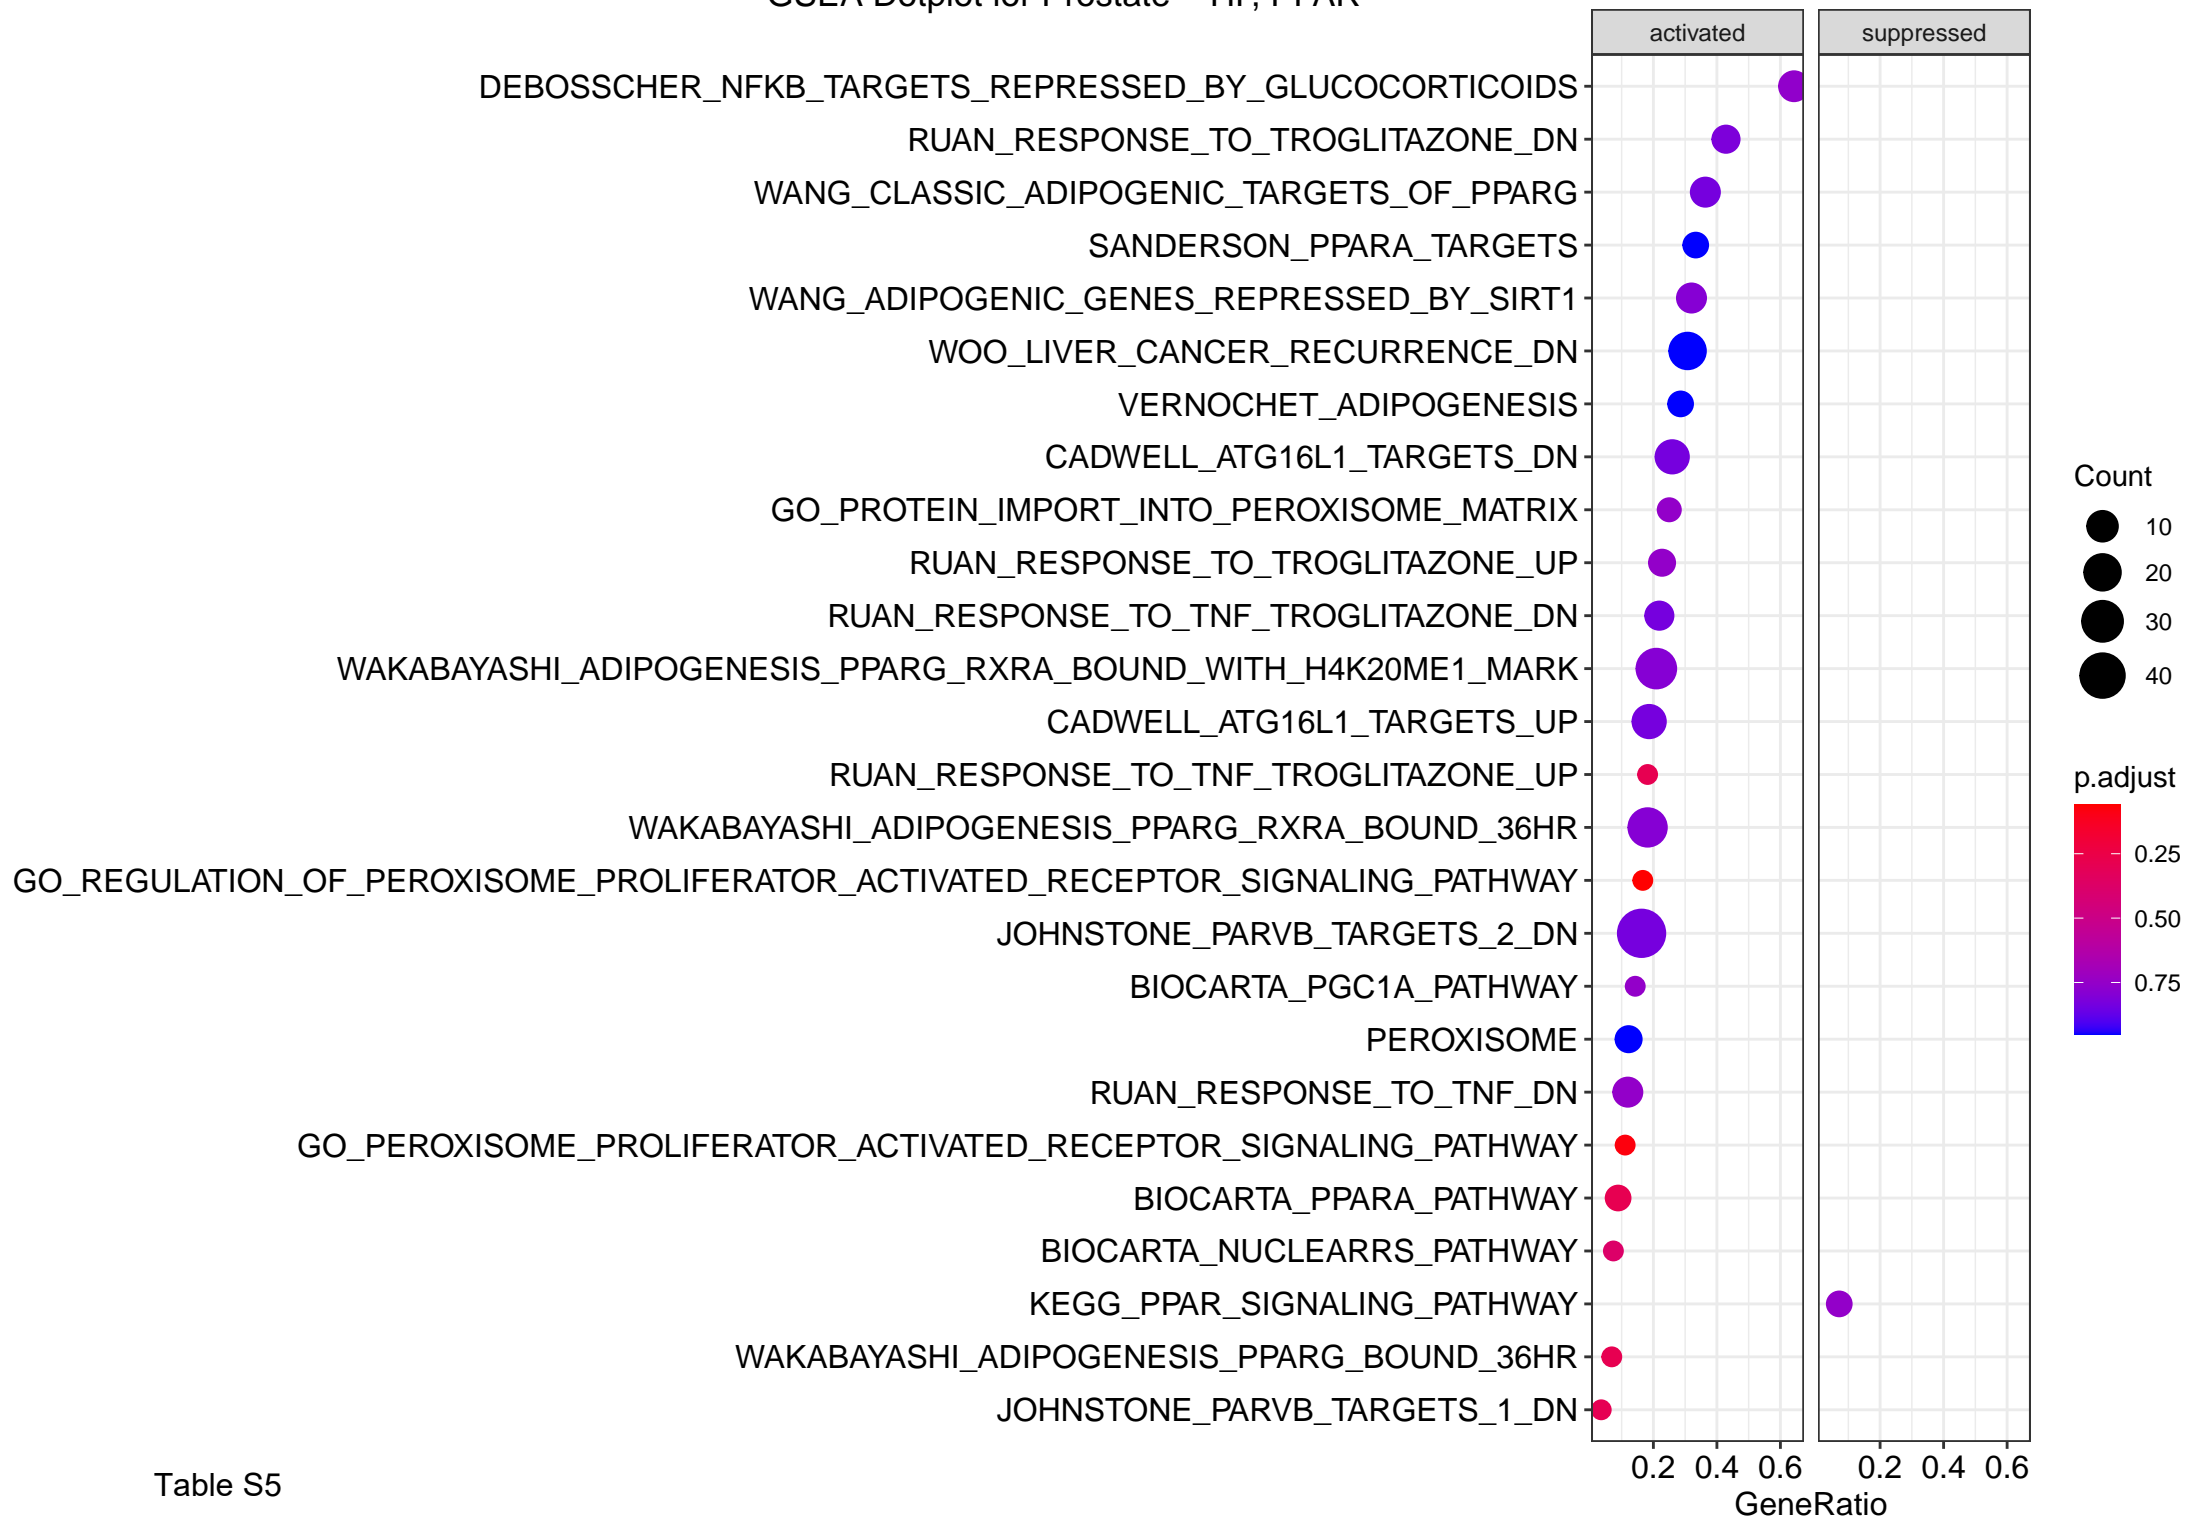



GSEA Dotplot for Prostate – HF, Prostate

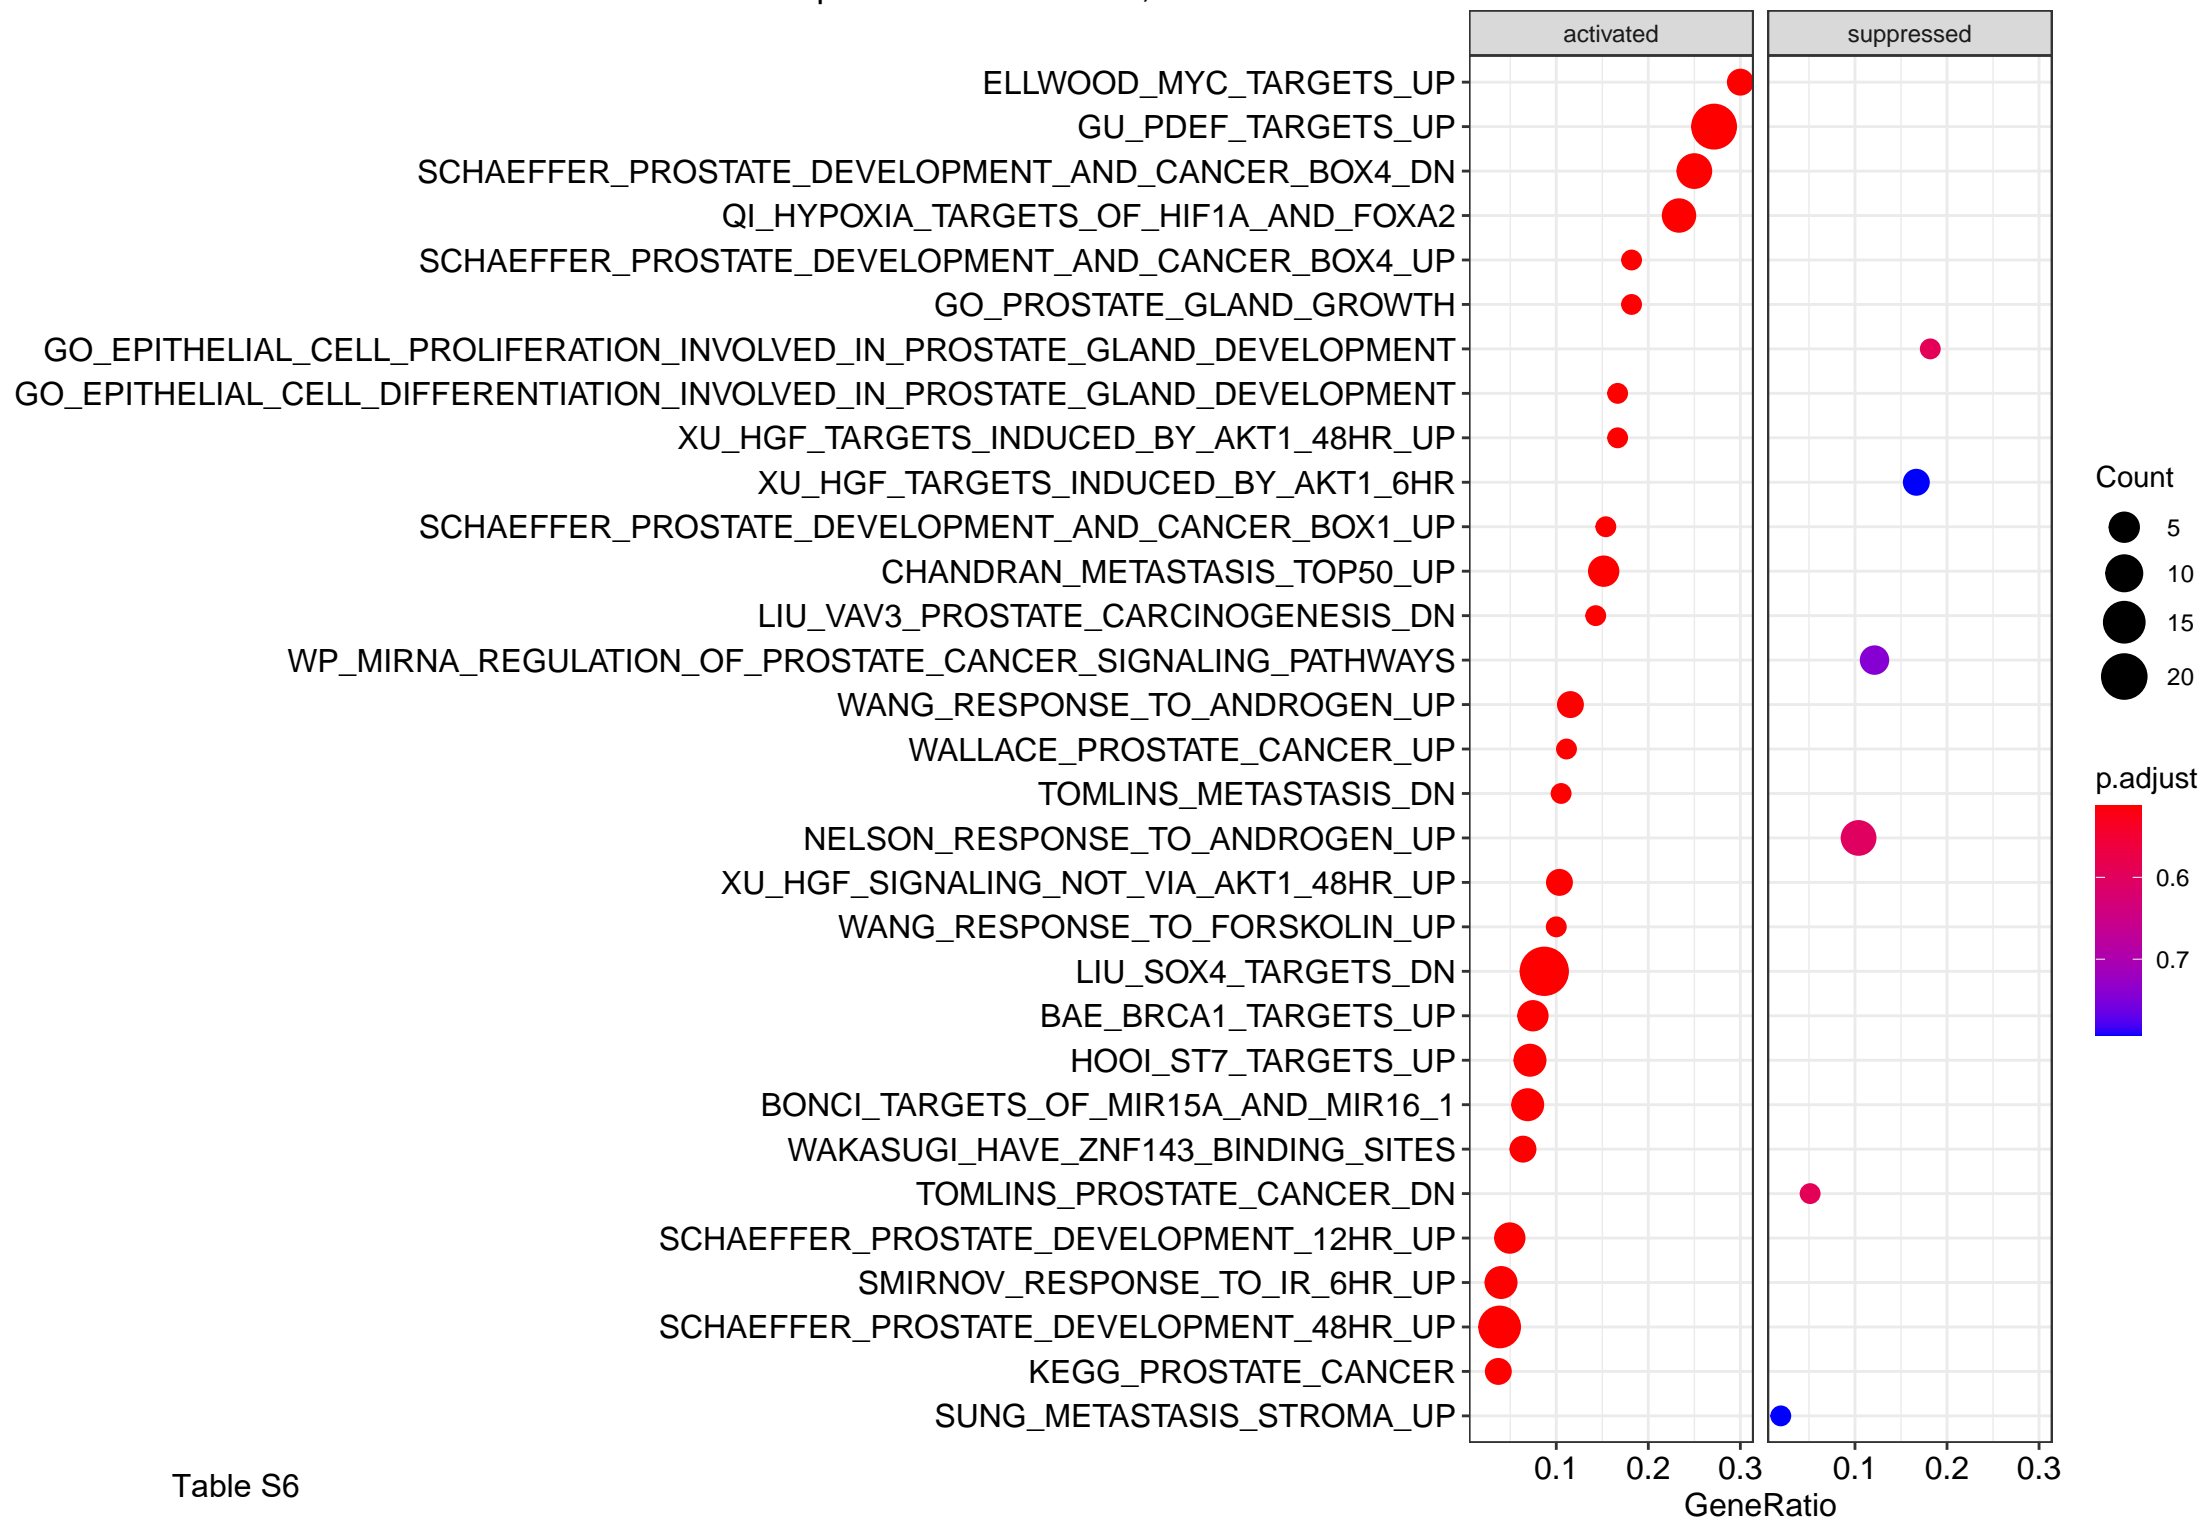



# GSEA Dotplot for Prostate – PFOS, Metabolism

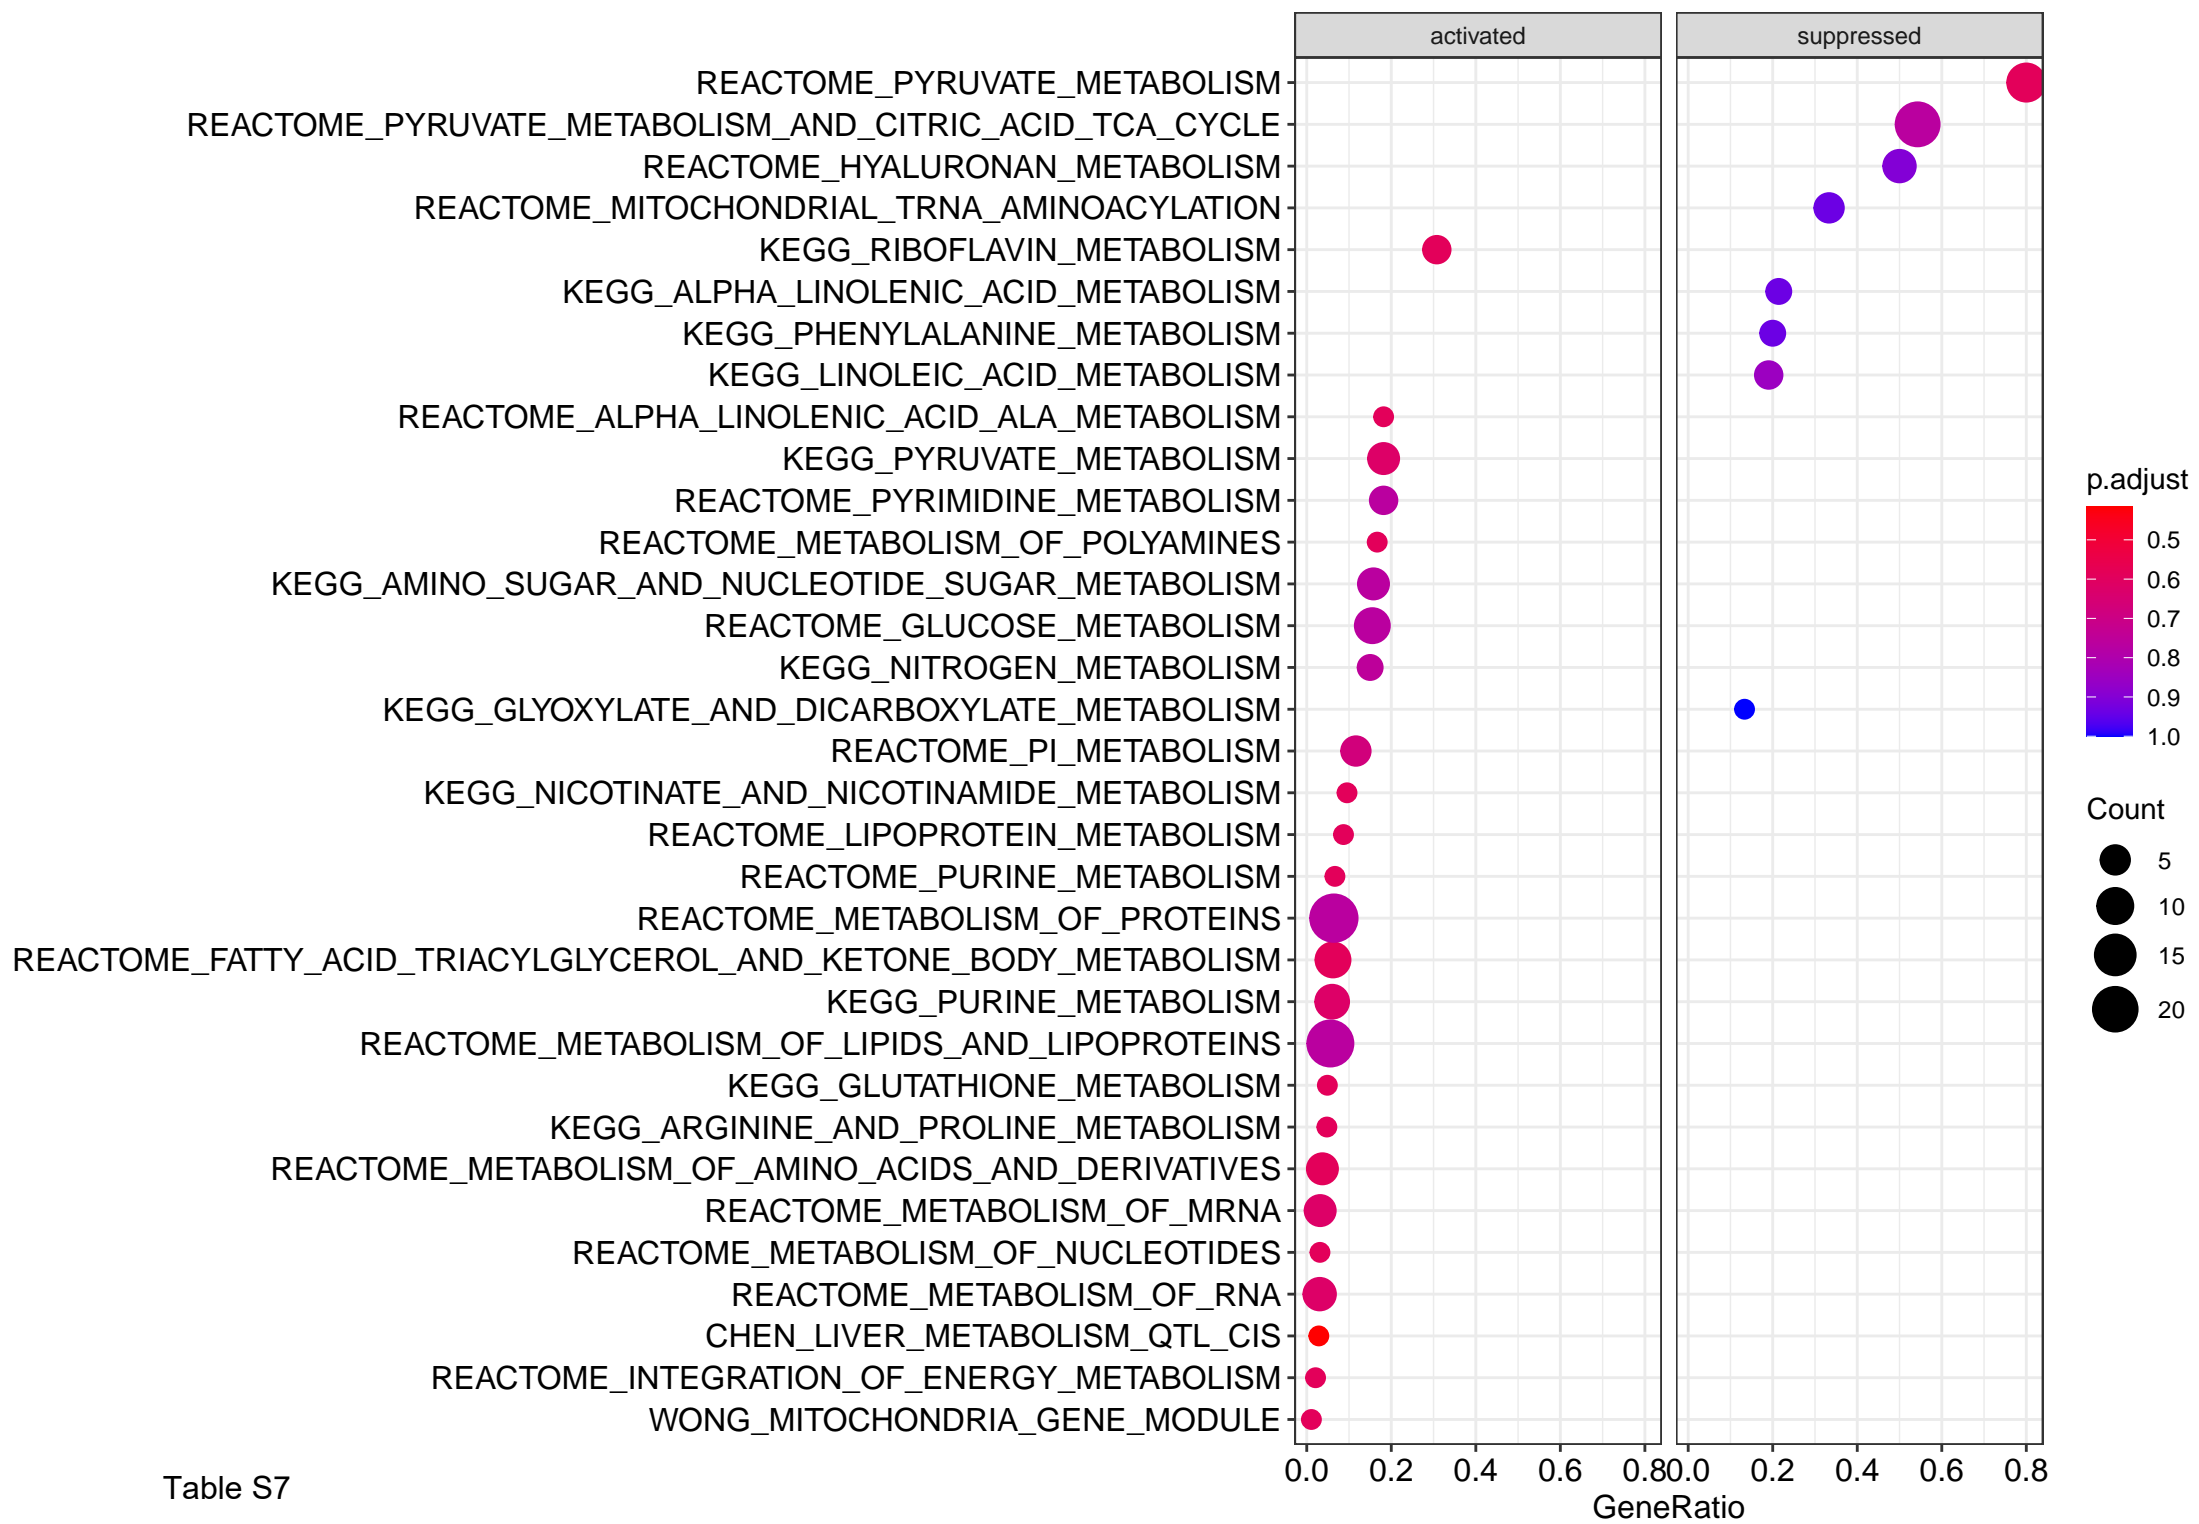

GSEA Dotplot for Prostate – PFOS, PPAR

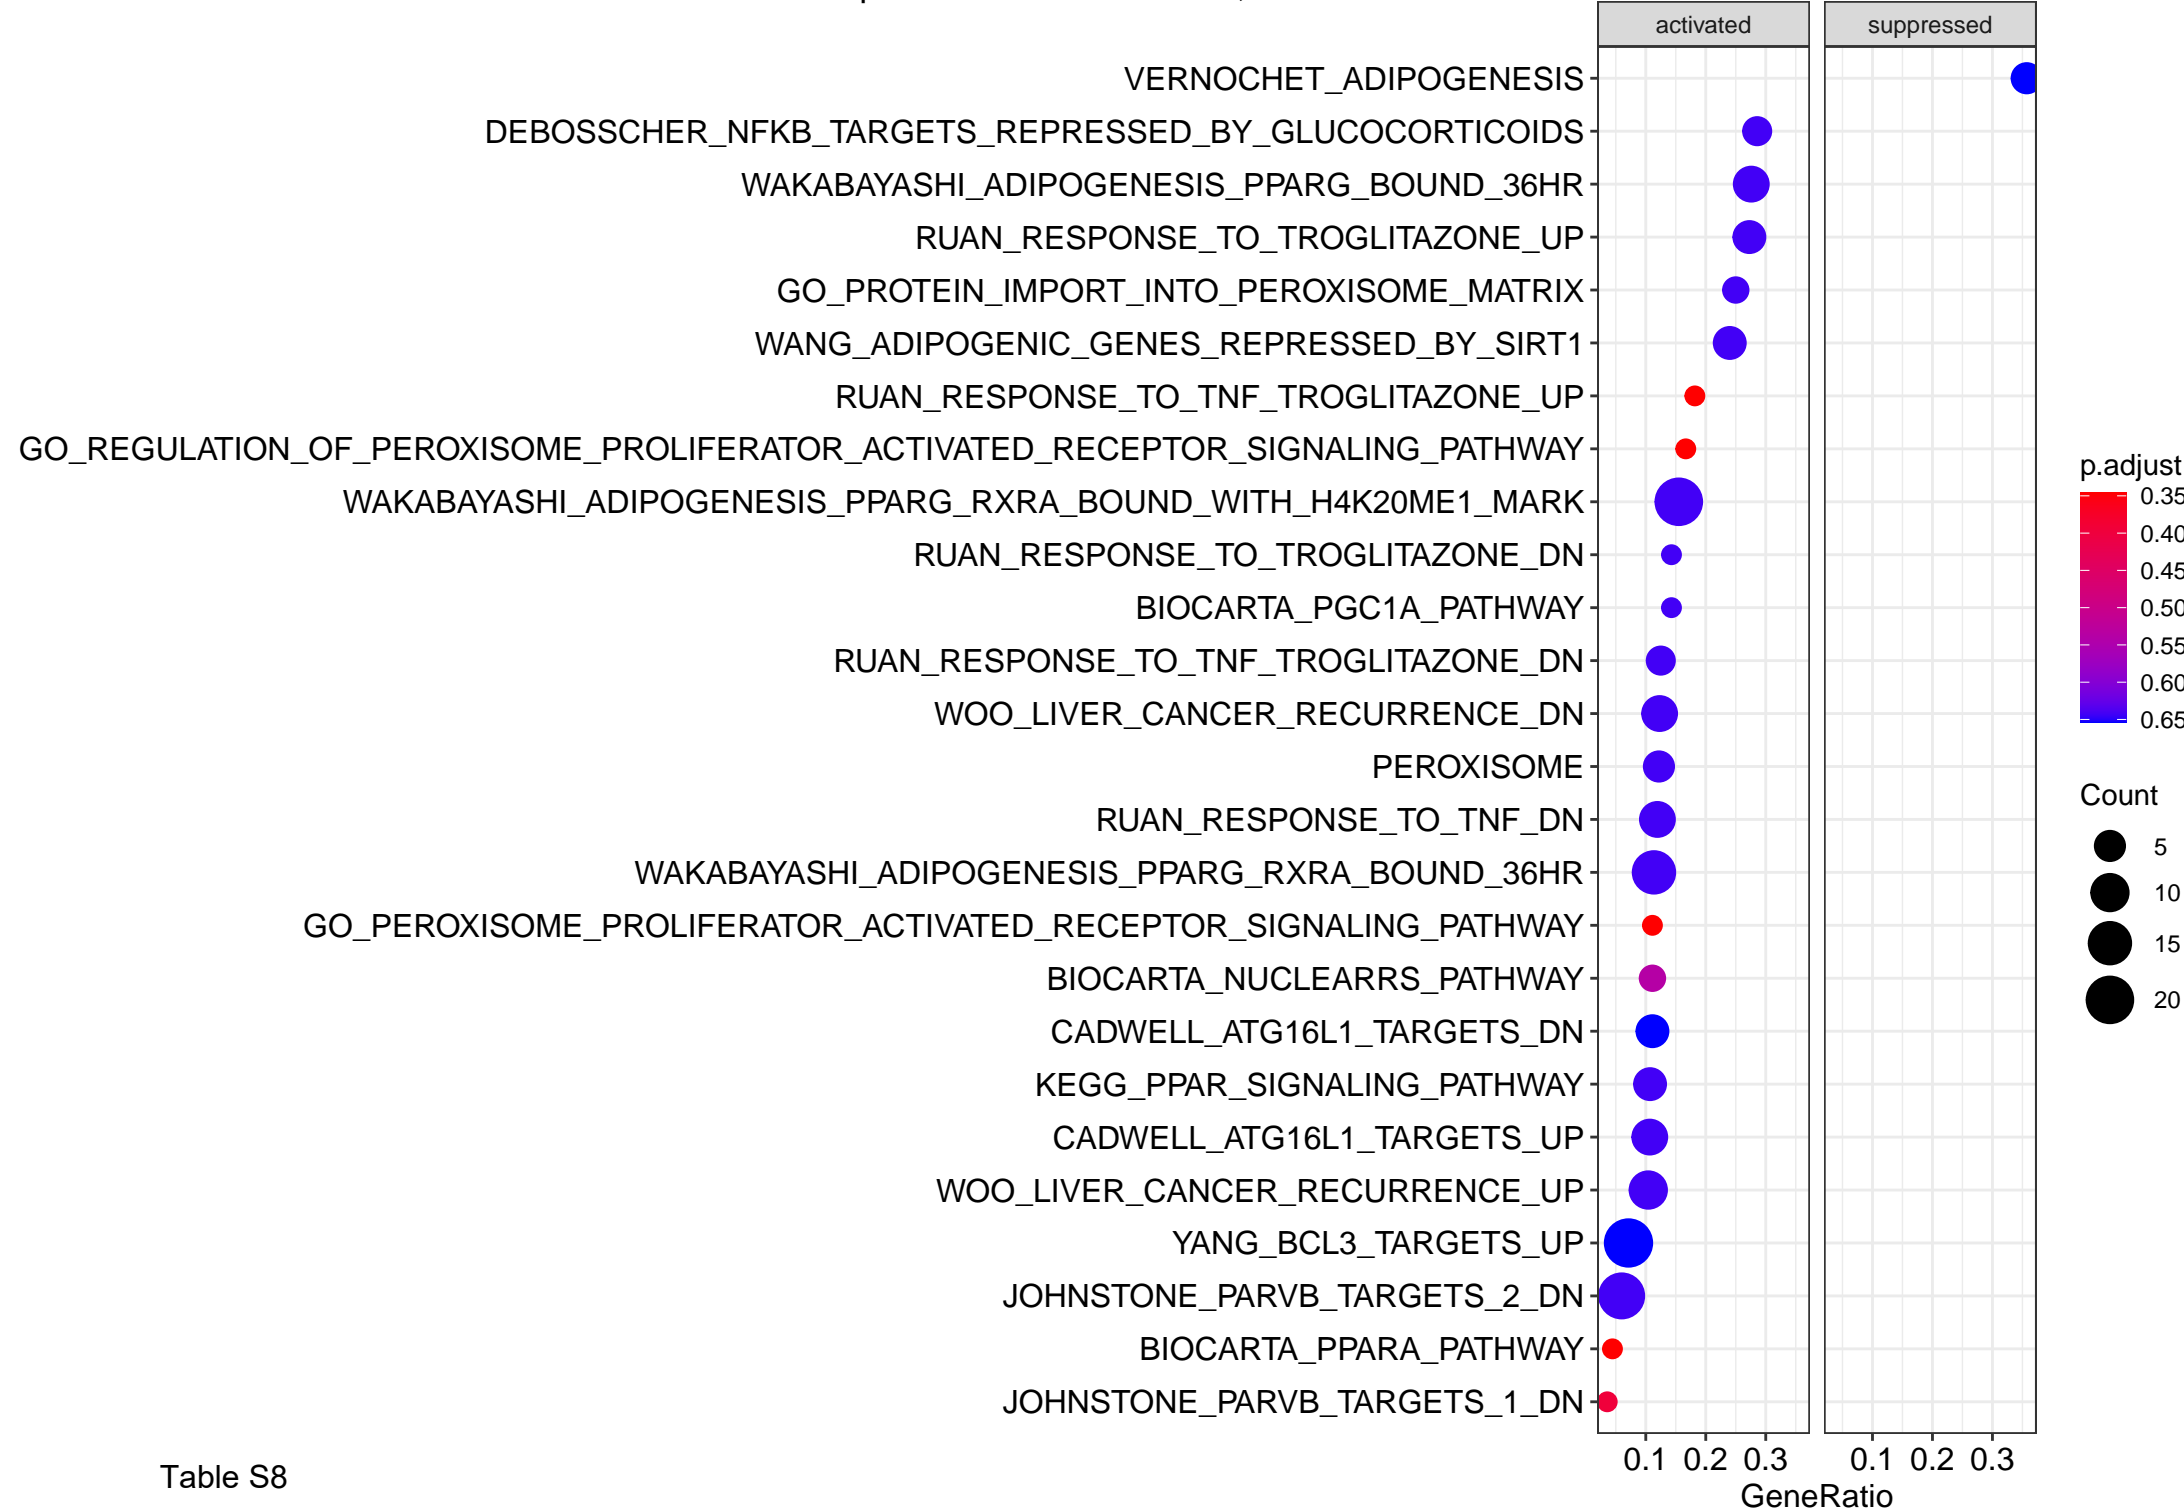

Table S8

GSEA Dotplot for Prostate – PFOS, Prostate

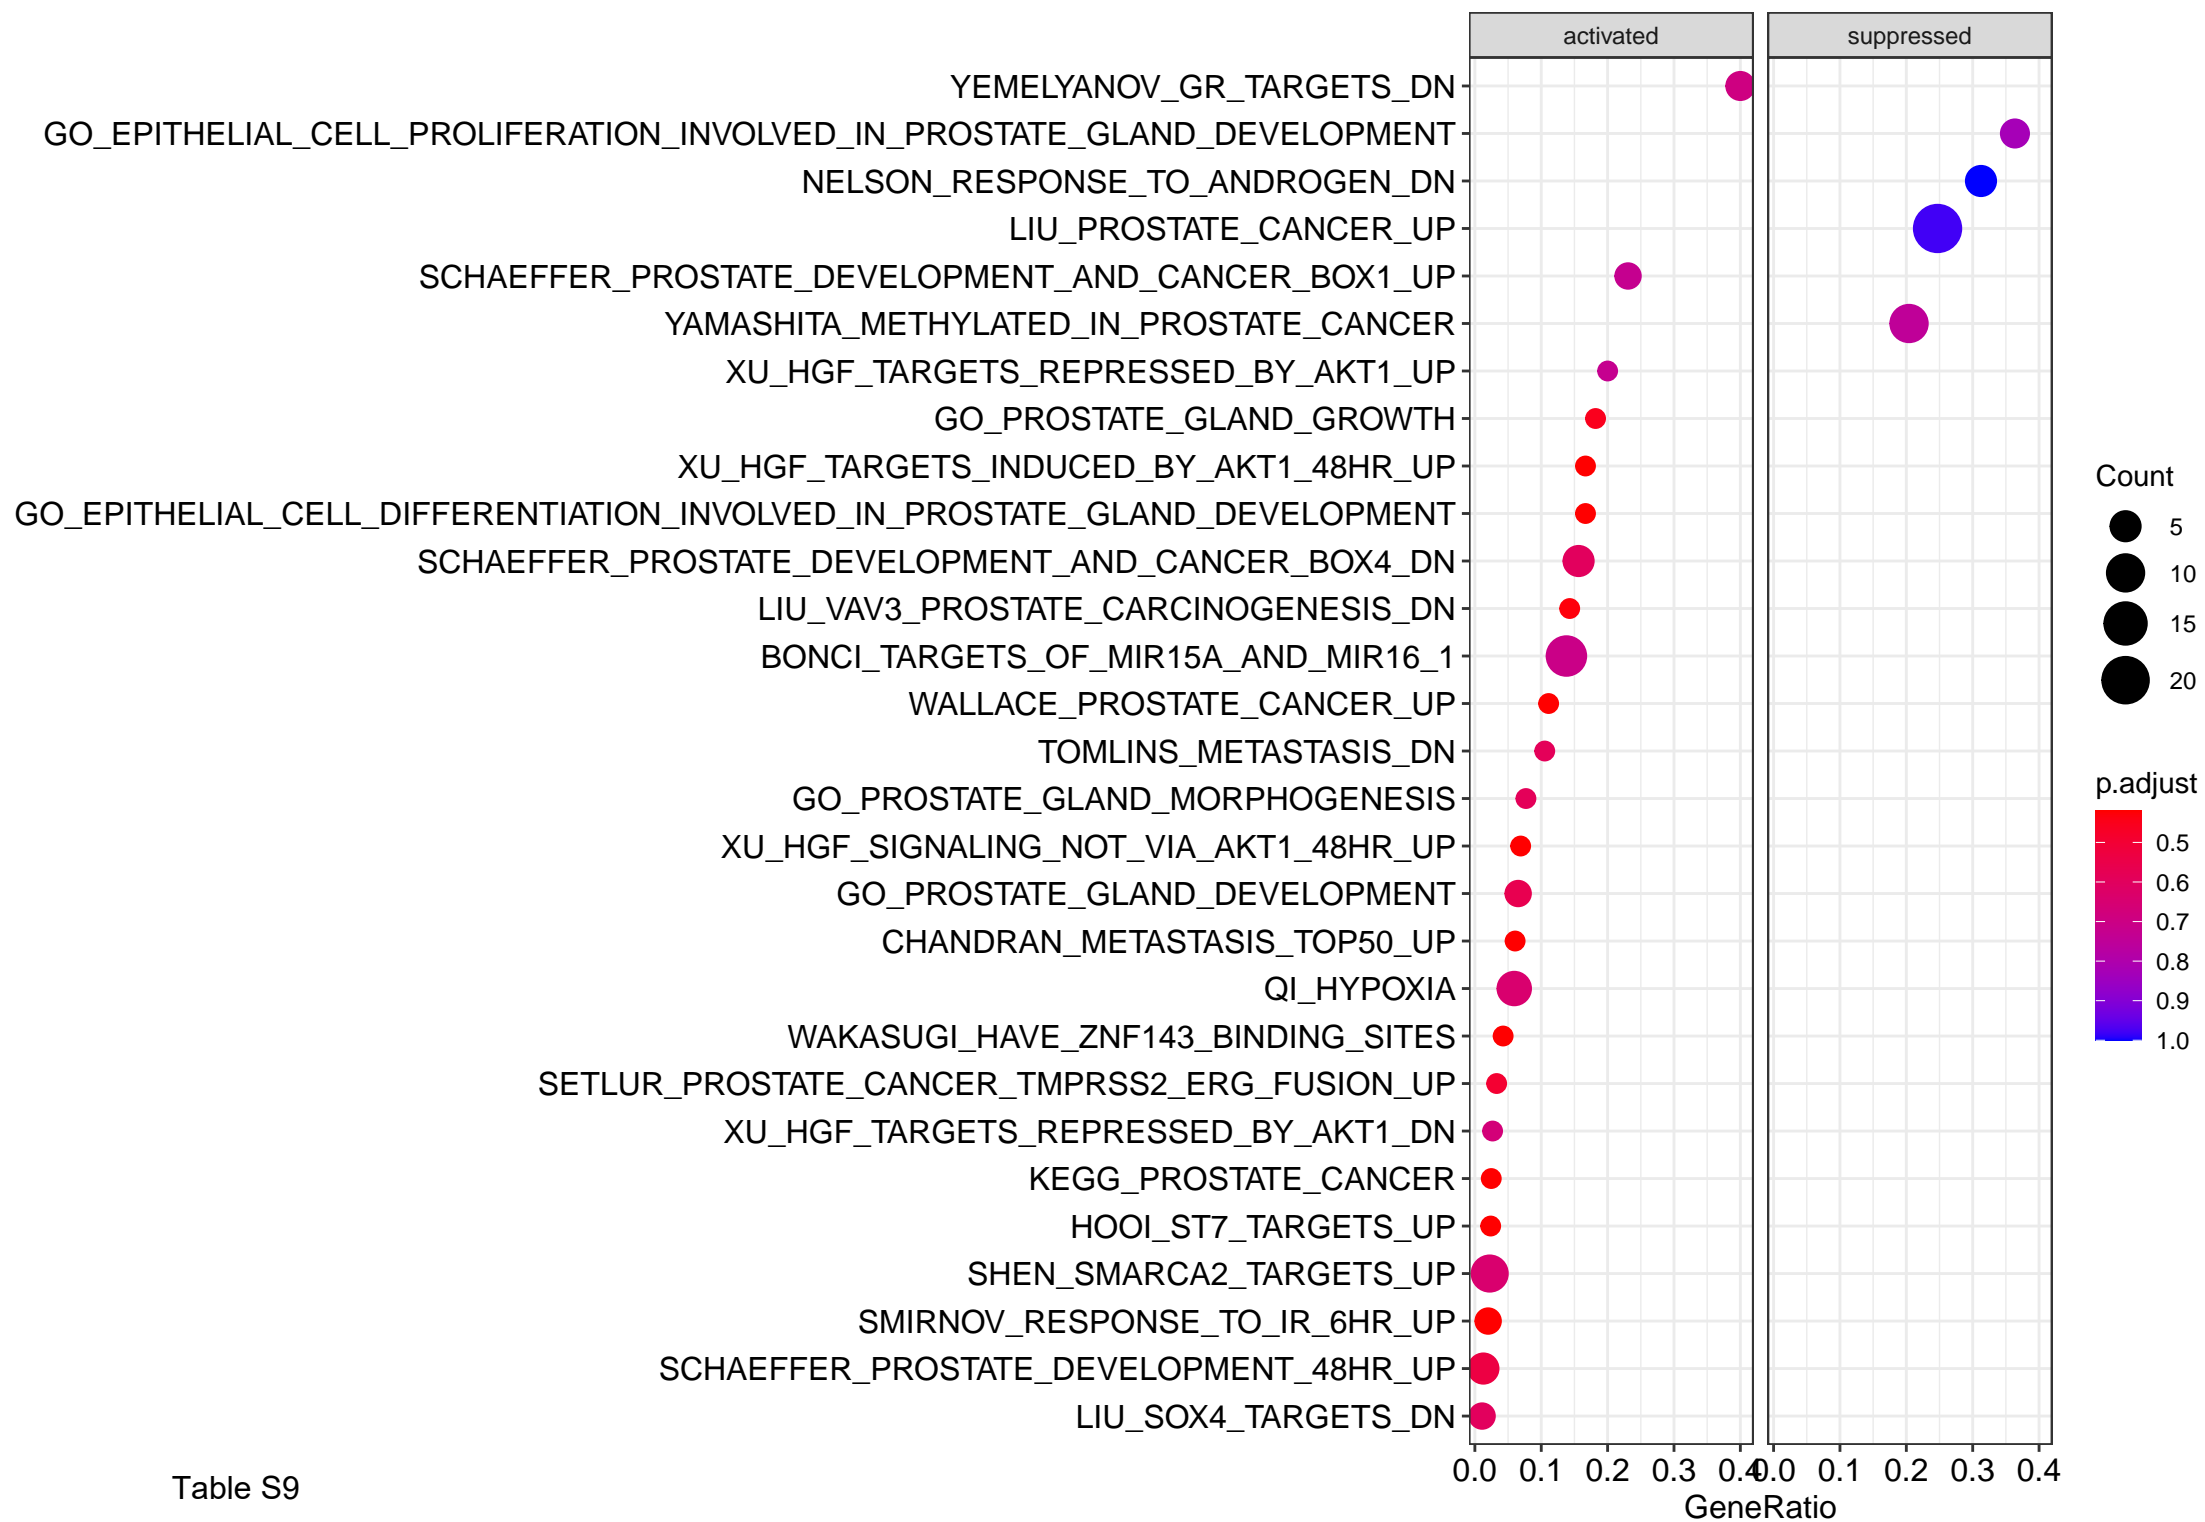

Table S9
